# Supplementary material for: At-line Prediction of Gelatinized Starch and Fiber Fractions in Extruded Dry Dog Food Using Different Near-Infrared Spectroscopy Technologies
Source: MDPI journal article supplement (doi:10.3390/ani10050862), 2020-05-16
Supplement: s1 [file s1]

Table S1 - List of ingredients for each sample as declared by the manufacturer in the label of the product

| sample | ingredients                                                                                                                                                                                                                                                                                                                                                                                                                                                                                                                                                                        |
|--------|------------------------------------------------------------------------------------------------------------------------------------------------------------------------------------------------------------------------------------------------------------------------------------------------------------------------------------------------------------------------------------------------------------------------------------------------------------------------------------------------------------------------------------------------------------------------------------|
| 1      | dehydrated chicken (26%), sorghum (20%), pea, chicken fat, dehydrated pork (9%), dehydrated alfalfa, dehydrated salmon (6%), hydrolyzed chicken protein, dehydrated whole eggs, salmon oil (1%), yeast, dried chicory pulp, sodium chloride, dehydrated turmeric (0.3%), fructo-oligosaccharides (0.2%), mannan-oligosaccharides (0.2%), glucosamine (0.15%), chondroitin sulphate (0.09%), red raspberry dehydrated (0.05%), dehydrated blackberry, dehydrated blackcurrant, pomegranate dehydrated, mojave yucca                                                                 |
| 2      | dehydrated chicken (25%), sorghum (20%), pea, chicken fat, dehydrated pork (9%), dehydrated alfalfa, dehydrated salmon (6%), hydrolyzed chicken protein, dehydrated whole eggs, yeast, dried chicory pulp, salmon oil (1%), sodium chloride, dehydrated turmeric (0.3%), fructo-oligosaccharides (0.2%), mannan-oligosaccharides (0.2%), glucosamine (0.15%), calcium carbonate, chondroitin sulphate (0.09%), red raspberry dehydrated (0.05%), dehydrated blackberry, dehydrated blackcurrant, pomegranate dehydrated, mojave yucca                                              |
| 3      | dehydrated chicken (26%), sorghum (20%), pea, chicken fat, dehydrated pork (9%), dehydrated alfalfa, dehydrated salmon (6%), hydrolyzed chicken protein, dehydrated whole eggs, salmon oil (1%), yeast, dried chicory pulp, sodium chloride, dehydrated turmeric (0.3%), fructo-oligosaccharides (0.2%), mannan-oligosaccharides (0.2%), glucosamine (0.15%), chondroitin sulphate (0.09%), red raspberry dehydrated (0.05%), dehydrated blackberry, dehydrated blackcurrant, pomegranate dehydrated, mojave yucca                                                                 |
| 4      | dehydrated chicken (26%), sorghum (20%), pea, chicken fat, dehydrated pork (9%), dehydrated alfalfa, dehydrated salmon (6%), hydrolyzed chicken protein, dehydrated whole eggs, salmon oil (1%), yeast, dried chicory pulp, sodium chloride, dehydrated turmeric (0.3%), fructo-oligosaccharides (0.2%), mannan-oligosaccharides (0.2%), glucosamine (0.15%), chondroitin sulphate (0.09%), red raspberry dehydrated (0.05%), dehydrated blackberry, dehydrated blackcurrant, pomegranate dehydrated, mojave yucca                                                                 |
| 5      | dehydrated chicken (25%), sorghum (20%), pea, chicken fat, dehydrated pork (9%), dehydrated alfalfa, dehydrated salmon (6%), hydrolyzed chicken protein, dehydrated whole eggs, yeast, dried chicory pulp, salmon oil (1%), sodium chloride, dehydrated turmeric (0.3%), fructo-oligosaccharides (0.2%), mannan-oligosaccharides (0.2%), glucosamine (0.15%), calcium carbonate, chondroitin sulphate (0.09%), red raspberry dehydrated (0.05%), dehydrated blackberry, dehydrated blackcurrant, pomegranate dehydrated, mojave yucca                                              |
| 6      | dehydrated pork (37%), dehydrated pea, dehydrated banana, chicken fat, dehydrated rabbit (5%), hydrolyzed chicken protein, dehydrated alfalfa, salmon oil, dehydrated herring, dehydrated whole eggs (1%), yeast, dried chicory pulp, sodium chloride, calcium carbonate, linseed oil (0.4%), fructo-oligosaccharides (0.2%), mannan-oligosaccharides (0.2%), apple, pomegranate, pumpkin, green tea, spinach, fennel, borage, chamomile, liquorice, tomato, rosehip, sage, peppermint, glucosamine (0.04%), raspberry, blackberry, mojave yucca, chondroitin sulphate (0.01%)     |
| 7      | dehydrated chicken (42%), dehydrated pea, dehydrated banana, chicken fat, dehydrated duck (6%), hydrolyzed chicken protein, dehydrated alfalfa, salmon oil, dehydrated herring, dehydrated whole eggs (1%), yeast, dried chicory pulp, sodium chloride, monosodium phosphate, linseed oil (0.4%), fructo-oligosaccharides (0.2%), mannan-oligosaccharides (0.2%), apple, pomegranate, pumpkin, green tea, spinach, fennel, borage, chamomile, liquorice, tomato, rosehip, sage, peppermint, glucosamine (0.04%), raspberry, blackberry, mojave yucca, chondroitin sulphate (0.01%) |
| 8      | dehydrated chicken (26%), sorghum (20%), pea, dehydrated alfalfa, dehydrated pork (7%), dehydrated salmon (7%), dried chicory pulp, hydrolyzed chicken protein, chicken fat, salmon oil (1%), yeast, dehydrated whole eggs, sodium chloride, dehydrated turmeric (0.3%), fructo-oligosaccharides (0.2%), mannan-oligosaccharides (0.2%), glucosamine (0.15%), chondroitin sulphate (0.09%), red raspberry dehydrated (0.05%), dehydrated blackberry, dehydrated blackcurrant, pomegranate dehydrated, mojave yucca                                                                 |
| 9      | rice (49%), dehydrated pork (26%), pork fat, dried chicory pulp, dehydrated alfalfa, hydrolyzed pork protein, monocalcic phosphate, brewer's yeast (3%), potassium chloride, pea fiber, flax seeds, sodium chloride, mannan-oligosaccharides (0.3%), fructo-oligosaccharides (0.2%), psyllium husks and seeds, $\beta$ -1,3/1,6 glucans from baker's yeast <i>Saccharomyces cerevisiae</i> (0.07%)                                                                                                                                                                                 |
| 10     | dehydrated chicken (22%), sorghum (20%), pea, chicken fat, dehydrated pork (8%), dehydrated alfalfa, dehydrated salmon (6%), hydrolyzed chicken protein, yeast, dried chicory pulp, salmon oil (0.8%), dehydrated whole eggs, sodium chloride, dehydrated turmeric (0.3%), fructo-oligosaccharides (0.2%), mannan-oligosaccharides (0.2%), calcium carbonate, glucosamine (0.15%), chondroitin sulphate (0.09%), red raspberry dehydrated (0.05%), dehydrated blackberry, dehydrated blackcurrant, pomegranate dehydrated, mojave yucca                                            |

|    |                                                                                                                                                                                                                                                                                                                                                                                                                                                                                           |
|----|-------------------------------------------------------------------------------------------------------------------------------------------------------------------------------------------------------------------------------------------------------------------------------------------------------------------------------------------------------------------------------------------------------------------------------------------------------------------------------------------|
| 11 | pea (65%), dehydrated pork (22%), sunflower oil, hydrolyzed pork protein, flax seeds (1%), calcium carbonate, sodium chloride, aloe vera (0.03%), rosemary                                                                                                                                                                                                                                                                                                                                |
| 12 | rice (51%), dehydrated pork (25%), pork fat, dried chicory pulp, dehydrated alfalfa, monocalcic phosphate, brewer's yeast (3%), potassium chloride, pea fiber, flax seeds, sodium chloride, mannan-oligosaccharides (0.3%), fructo-oligosaccharides (0.2%), psyllium husks and seeds, $\beta$ -1,3/1,6 glucans from baker's yeast <i>Saccaromyces cerevisiae</i> (0.07%)                                                                                                                  |
| 13 | potato (70%), dehydrated rabbit (20%), sunflower oil, calcium carbonate, monosodium phosphate, flax seeds (1%), sodium chloride, aloe vera (0.03%), rosemary                                                                                                                                                                                                                                                                                                                              |
| 14 | dehydrated pork (22%), sorghum (20%), pea, dehydrated lamb (10%), pork fat, dehydrated alfalfa, hydrolyzed pork protein, dehydrated whole eggs (1%), yeast, dried chicory pulp, salmon oil (0.8%), sodium chloride, dehydrated turmeric (0.3%), fructo-oligosaccharides (0.2%), mannan-oligosaccharides (0.2%), glucosamine (0.15%), chondroitin sulphate (0.09%), red raspberry dehydrated (0.05%), dehydrated blackberry, dehydrated blackcurrant, pomegranate dehydrated, mojave yucca |
| 15 | dehydrated lamb (28%), rice, pea, pork fat, hydrolysed animal proteins with low molecular weight, dehydrated alfalfa, hemp (1%), yeast, dried chicory pulp (0.5%), sodium chloride, camelina oil (0.3%), olive oil (0.3%), $\beta$ -1,3 glucans from baker's yeast <i>Saccaromyces cerevisiae</i> (0.06%), glucosamine (0.04%), dehydrated broccoli (0.03%), pomegranate dehydrated (0.03%), tomato dehydrated (0.03%), mojave yucca, chondroitin sulphate (0.01%)                        |
| 16 | dehydrated chicken (30%), corn, rice, chicken fat, dried beet pulp, hydrolyzed chicken protein, flax seeds oil (1.4%), yeast, olive oil (0.4%), dried chicory pulp (0.4%), pea fiber (0.4%), calcium carbonate, sodium chloride, glucosamine (0.04%), pomegranate dehydrated (0.03%), tomato dehydrated (0.03%), mojave yucca (0.02%), chondroitin sulphate (0.01%)                                                                                                                       |
| 17 | cereals (rice 4%), meat and animal derivatives (chicken 13%), oils and fats, derivatives of vegetable origin, minerals                                                                                                                                                                                                                                                                                                                                                                    |
| 18 | potato (71%), dehydrated venison (20%), sunflower oil, flax seeds (1%), monosodium phosphate, sodium chloride, aloe vera (0.03%), rosemary                                                                                                                                                                                                                                                                                                                                                |
| 19 | dehydrated duck (30%), corn, rice, chicken fat, dried beet pulp, yeast, hydrolyzed chicken protein, flax seeds oil (1.4%), olive oil (0.4%), dried chicory pulp (0.4%), pea fiber (0.4%), calcium carbonate, sodium chloride, pomegranate dehydrated (0.03%), tomato dehydrated (0.03%), mojave yucca (0.02%)                                                                                                                                                                             |
| 20 | dehydrated chicken (30%), oats, corn, rice, dried beet pulp, dried chicory pulp (5%), chicken fat, yeast, hydrolyzed chicken protein, flax seeds oil (1.4%), pea fiber (1%), olive oil (0.4%), calcium carbonate, fructo-oligosaccharides (0.2%), sodium chloride, glucosamine, pomegranate dehydrated (0.03%), tomato dehydrated (0.03%), mojave yucca (0.02%)                                                                                                                           |
| 21 | Corn, dehydrated fish (22%), rice, chicken fat, dried beet pulp, flax seeds oil (1.4%), yeast, olive oil (0.4%), dried chicory pulp (0.4%), pea fiber (0.2%), calcium carbonate, sodium chloride, pomegranate dehydrated (0.03%), tomato dehydrated (0.03%), mojave yucca (0.02%)                                                                                                                                                                                                         |
| 22 | Corn, dehydrated chicken (30%), rice, pork fat, dried beet pulp, hydrolyzed chicken protein, flax seeds oil (0.5%), dried chicory pulp (0.3%), pea fiber (0.4%), calcium carbonate, sodium chloride, glucosamine (0.04%), pomegranate dehydrated (0.03%), tomato dehydrated (0.03%), mojave yucca (0.02%), chondroitin sulphate (0.01%)                                                                                                                                                   |
| 23 | dehydrated lamb (28%), rice, pea, pork fat, hydrolysed animal proteins with low molecular weight, dehydrated alfalfa, hemp (1%), yeast, dried chicory pulp (0.5%), sodium chloride, camelina oil (0.3%), olive oil (0.3%), $\beta$ -1,3 glucans from baker's yeast <i>Saccaromyces cerevisiae</i> (0.06%), glucosamine (0.04%), dehydrated broccoli (0.03%), pomegranate dehydrated (0.03%), tomato dehydrated (0.03%), mojave yucca, chondroitin sulphate (0.01%)                        |
| 24 | dehydrated chicken (32%), corn, rice, chicken fat, dried beet pulp, hydrolyzed chicken protein, flax seeds oil (1.4%), yeast, olive oil (0.4%), dried chicory pulp (0.4%), pea fiber (0.4%), calcium carbonate, sodium chloride, glucosamine (0.04%), pomegranate dehydrated (0.03%), tomato dehydrated (0.03%), mojave yucca (0.02%)                                                                                                                                                     |
| 25 | dehydrated lamb (28%), rice, pea, pork fat, hydrolysed animal proteins with low molecular weight, dehydrated alfalfa, hemp (1%), yeast, dried chicory pulp (0.5%), sodium chloride, camelina oil (0.3%), olive oil (0.3%), $\beta$ -1,3 glucans from baker's yeast <i>Saccaromyces cerevisiae</i> (0.06%), glucosamine (0.04%), dehydrated broccoli (0.03%), pomegranate dehydrated (0.03%), tomato dehydrated (0.03%), mojave yucca, chondroitin sulphate (0.01%)                        |
| 26 | dehydrated chicken (32%), corn, rice, chicken fat, dried beet pulp, hydrolyzed chicken protein, flax seeds oil (1.4%), yeast, olive oil (0.4%), dried chicory pulp (0.4%), pea fiber (0.4%), calcium carbonate, sodium chloride, glucosamine (0.04%), pomegranate dehydrated (0.03%), tomato dehydrated (0.03%), mojave                                                                                                                                                                   |

|    |                                                                                                                                                                                                                                                                                                                                                                                                                                                                                                                                         |
|----|-----------------------------------------------------------------------------------------------------------------------------------------------------------------------------------------------------------------------------------------------------------------------------------------------------------------------------------------------------------------------------------------------------------------------------------------------------------------------------------------------------------------------------------------|
|    | yucca (0.02%)                                                                                                                                                                                                                                                                                                                                                                                                                                                                                                                           |
| 27 | Corn, dehydrated fish (20%), rice, chicken fat, dried beet pulp, flax seeds oil (1.4%), yeast, olive oil (0.4%), pea fiber (0.4%), dried chicory pulp (0.4%), calcium carbonate, sodium chloride, pomegranate dehydrated (0.03%), tomato dehydrated (0.03%), mojave yucca (0.02%)                                                                                                                                                                                                                                                       |
| 28 | dehydrated lamb (25%), rice, corn, pork fat, dehydrated alfalfa, dried beet pulp, yeast, sodium chloride, monosodium phosphate, camelina oil (0.3%), olive oil (0.3%), $\beta$ -1,3 glucans from baker's yeast <i>Saccaromyces cerevisiae</i> (0.06%), glucosamine (0.04%), dehydrated broccoli (0.03%), pomegranate dehydrated (0.03%), tomato dehydrated (0.03%), mojave yucca, chondroitin sulphate (0.01%)                                                                                                                          |
| 29 | dehydrated duck (30%), corn, rice, chicken fat, dehydrated alfalfa, flax seeds oil (1.4%), yeast, olive oil (0.4%), dried chicory pulp (0.4%), pea fiber (0.4%), calcium carbonate, sodium chloride, pomegranate dehydrated (0.03%), tomato dehydrated (0.03%), mojave yucca (0.02%)                                                                                                                                                                                                                                                    |
| 30 | Corn, dehydrated fish (20%), rice, chicken fat, dried beet pulp, flax seeds oil (1.4%), yeast, olive oil (0.4%), dried chicory pulp (0.4%), pea fiber (0.4%), sodium chloride, pomegranate dehydrated (0.03%), tomato dehydrated (0.03%), mojave yucca (0.02%)                                                                                                                                                                                                                                                                          |
| 31 | dehydrated chicken (30%), corn, rice, chicken fat, dried beet pulp, hydrolyzed chicken protein, sodium chloride, flax seeds oil (1.4%), yeast, olive oil (0.4%), dried chicory pulp (0.4%), pea fiber (0.4%), calcium carbonate, glucosamine (0.04%), pomegranate dehydrated (0.03%), tomato dehydrated (0.03%), mojave yucca (0.02%)                                                                                                                                                                                                   |
| 32 | dehydrated rabbit (23%), corn, rice, chicken fat, dried beet pulp, yeast, flax seeds oil (1.4%), olive oil (0.4%), dried chicory pulp (0.4%), pea fiber (0.4%), calcium carbonate, glucosamine (0.04%), pomegranate dehydrated (0.03%), tomato dehydrated (0.03%), mojave yucca (0.02%)                                                                                                                                                                                                                                                 |
| 33 | dehydrated lamb (25%), rice, corn, pork fat, dehydrated alfalfa, dried beet pulp, yeast, sodium chloride, monosodium phosphate, camelina oil (0.3%), olive oil (0.3%), $\beta$ -1,3 glucans from baker's yeast <i>Saccaromyces cerevisiae</i> (0.06%), glucosamine (0.04%), dehydrated broccoli (0.03%), pomegranate dehydrated (0.03%), tomato dehydrated (0.03%), mojave yucca, chondroitin sulphate (0.01%)                                                                                                                          |
| 34 | dehydrated chicken (30%), corn, rice, chicken fat, dried beet pulp, hydrolyzed chicken protein, sodium chloride, flax seeds oil (1.4%), yeast, olive oil (0.4%), dried chicory pulp (0.4%), pea fiber (0.4%), calcium carbonate, glucosamine (0.04%), pomegranate dehydrated (0.03%), tomato dehydrated (0.03%), mojave yucca (0.02%)                                                                                                                                                                                                   |
| 35 | potato (68%), dehydrated duck (21%), sunflower oil, flax seeds (1%), monosodium phosphate, sodium chloride, aloe vera (0.03%), rosemary                                                                                                                                                                                                                                                                                                                                                                                                 |
| 36 | Dehydrated fish (28%), corn, rice, chicken fat, dried beet pulp, dehydrated alfalfa, yeast, monosodium phosphate, flax seeds oil (0.5%), dried chicory pulp (0.3%), olive oil (0.3%), fructo-oligosaccharides, mannan-oligosaccharides (0.04%), glucosamine (0.04%), red pomegranate dehydrated (0.03%), tomato dehydrated (0.03%), mojave yucca, chondroitin sulphate (0.01%)                                                                                                                                                          |
| 37 | dehydrated chicken (32%), corn, rice, chicken fat, dried beet pulp, dehydrated alfalfa, hydrolysed chicken protein, yeast, sodium chloride, monosodium phosphate, flax seeds oil (0.5%), dried chicory pulp (0.3%), olive oil (0.3%), fructo-oligosaccharides, $\beta$ -1,3/1,6 glucans from baker's yeast <i>Saccaromyces cerevisiae</i> (0.04%), , glucosamine (0.04%), pomegranate dehydrated (0.03%), tomato dehydrated (0.03%), mojave yucca (0.02%), chondroitin sulphate (0.01%)                                                 |
| 38 | dehydrated pork (20%), sorghum, pea, wood substances, dried beet pulp, hemp (4%), dried chicory pulp, dehydrated alfalfa, pork fat, oat fibre, salmon oil, hydrolyzed pork protein, yeast, sodium chloride, calcium carbonate, $\beta$ -1,3/1,6 glucans from baker's yeast <i>Saccaromyces cerevisiae</i> (0.1%), glucosamine (0.06%), chondroitin sulphate (0.03%)                                                                                                                                                                     |
| 39 | dehydrated chicken (22%), sorghum (20%), pea, chicken fat, dehydrated pork (7%), dehydrated salmon (6%), dehydrated alfalfa, hydrolyzed chicken protein, yeast, dried chicory pulp, salmon oil (0.8%), dehydrated whole eggs, sodium chloride, dehydrated turmeric (0.3%), fructo-oligosaccharides (0.2%), mannan-oligosaccharides (0.2%), calcium carbonate, glucosamine (0.15%), chondroitin sulphate (0.09%), red raspberry dehydrated (0.05%), dehydrated blackberry, dehydrated blackcurrant, pomegranate dehydrated, mojave yucca |
| 40 | Corn, dehydrated fish (20%), rice, chicken fat, dried beet pulp, flax seeds oil (1.4%), yeast, olive oil (0.4%), dried chicory pulp (0.4%), pea fiber (0.4%), sodium chloride, pomegranate dehydrated (0.03%), tomato dehydrated (0.03%), mojave yucca (0.02%)                                                                                                                                                                                                                                                                          |
| 41 | dehydrated chicken (31%), corn, rice, chicken fat, dried beet pulp, yeast, dehydrated whole eggs, hydrolyzed chicken protein, flax seeds oil (1.4%), olive oil (0.4%), dried chicory pulp (0.4%), pea fiber (0.4%), calcium carbonate, sodium chloride, fructo-oligosaccharides (0.2%), glucosamine (0.04%), pomegranate dehydrated (0.03%), tomato dehydrated (0.03%), mojave yucca (0.02%), chondroitin sulphate (0.01%)                                                                                                              |

|    |                                                                                                                                                                                                                                                                                                                                                                                                                                                                                                                                                                                |
|----|--------------------------------------------------------------------------------------------------------------------------------------------------------------------------------------------------------------------------------------------------------------------------------------------------------------------------------------------------------------------------------------------------------------------------------------------------------------------------------------------------------------------------------------------------------------------------------|
| 42 | dehydrated chicken (32%), corn, rice, chicken fat, dried beet pulp, yeast, hydrolyzed chicken protein, dehydrated whole eggs, flax seeds oil (1.4%), olive oil (0.4%), pea fiber (0.4%), dried chicory pulp (0.4%), calcium carbonate, sodium chloride, fructo-oligosaccharides (0.2%), pomegranate dehydrated (0.03%), tomato dehydrated (0.03%), mojave yucca (0.02%)                                                                                                                                                                                                        |
| 43 | rice (51%), dehydrated pork (25%), pork fat, dried chicory pulp, dehydrated alfalfa, monocalcic phosphate, brewer's yeast (3%), potassium chloride, pea fiber, flax seeds, sodium chloride, mannan-oligosaccharides (0.3%), fructo-oligosaccharides (0.2%), psyllium husks and seeds, $\beta$ -1,3/1,6 glucans from baker's yeast <i>Saccaromyces cerevisiae</i> (0.07%)                                                                                                                                                                                                       |
| 44 | dehydrated chicken (31%), corn, rice, chicken fat, dried beet pulp, yeast, dehydrated whole eggs, hydrolyzed chicken protein, flax seeds oil (1.4%), olive oil (0.4%), dried chicory pulp (0.4%), pea fiber (0.4%), calcium carbonate, sodium chloride, fructo-oligosaccharides (0.2%), glucosamine (0.04%), pomegranate dehydrated (0.03%), tomato dehydrated (0.03%), mojave yucca (0.02%), chondroitin sulphate (0.01%)                                                                                                                                                     |
| 45 | Dehydrated fish (29%), corn, rice, chicken fat, dried beet pulp, dehydrated alfalfa, yeast, monosodium phosphate, flax seeds oil (0.5%), dried chicory pulp (0.3%), olive oil (0.3%), fructo-oligosaccharides, mannan-oligosaccharides (0.04%), glucosamine (0.04%), red pomegranate dehydrated (0.03%), tomato dehydrated (0.03%), mojave yucca                                                                                                                                                                                                                               |
| 46 | potato (68%), dehydrated duck (21%), sunflower oil, flax seeds (1%), monosodium phosphate, sodium chloride, aloe vera (0.03%), rosemary                                                                                                                                                                                                                                                                                                                                                                                                                                        |
| 47 | dehydrated chicken (32%), corn, rice, chicken fat, dried beet pulp, dehydrated alfalfa, hydrolysed chicken protein, yeast, sodium chloride, monosodium phosphate, flax seeds oil (0.5%), dried chicory pulp (0.3%), olive oil (0.3%), fructo-oligosaccharides, $\beta$ -1,3/1,6 glucans from baker's yeast <i>Saccaromyces cerevisiae</i> (0.04%), , glucosamine (0.04%), pomegranate dehydrated (0.03%), tomato dehydrated (0.03%), mojave yucca (0.02%), chondroitin sulphate (0.01%)                                                                                        |
| 48 | dehydrated chicken (32%), corn, rice, chicken fat, dried beet pulp, yeast, hydrolyzed chicken protein, dehydrated whole eggs, flax seeds oil (1.4%), olive oil (0.4%), pea fiber (0.4%), dried chicory pulp (0.4%), calcium carbonate, sodium chloride, fructo-oligosaccharides (0.2%), pomegranate dehydrated (0.03%), tomato dehydrated (0.03%), mojave yucca (0.02%)                                                                                                                                                                                                        |
| 49 | potato (70%), dehydrated rabbit (20%), sunflower oil, calcium carbonate, monosodium phosphate, flax seeds (1%), sodium chloride, aloe vera (0.03%), rosemary                                                                                                                                                                                                                                                                                                                                                                                                                   |
| 50 | potato (70%), dehydrated horse (19%), sunflower oil, flax seeds (1%), sodium chloride, aloe vera (0.03%), rosemary                                                                                                                                                                                                                                                                                                                                                                                                                                                             |
| 51 | potato (70%), dehydrated rabbit (20%), sunflower oil, calcium carbonate, monosodium phosphate, flax seeds (1%), sodium chloride, aloe vera (0.03%), rosemary                                                                                                                                                                                                                                                                                                                                                                                                                   |
| 52 | dehydrated chicken (26%), sorghum (20%), pea, chicken fat, dehydrated pork (9%), dehydrated alfalfa, dehydrated salmon (6%), hydrolyzed chicken protein, dehydrated whole eggs, salmon oil (1%), yeast, dried chicory pulp, sodium chloride, dehydrated turmeric (0.3%), fructo-oligosaccharides (0.2%), mannan-oligosaccharides (0.2%), glucosamine (0.15%), chondroitin sulphate (0.09%), red raspberry dehydrated (0.05%), dehydrated blackberry, dehydrated blackcurrant, pomegranate dehydrated, mojave yucca                                                             |
| 53 | Dehydrated fish (28%), corn, rice, chicken fat, dried beet pulp, dehydrated alfalfa, yeast, monosodium phosphate, flax seeds oil (0.5%), dried chicory pulp (0.3%), olive oil (0.3%), fructo-oligosaccharides, mannan-oligosaccharides (0.04%), glucosamine (0.04%), red pomegranate dehydrated (0.03%), tomato dehydrated (0.03%), mojave yucca, chondroitin sulphate (0.01%)                                                                                                                                                                                                 |
| 54 | dehydrated pork (37%), dehydrated pea, dehydrated banana, chicken fat, dehydrated rabbit (5%), hydrolyzed chicken protein, dehydrated alfalfa, salmon oil, dehydrated herring, dehydrated whole eggs (1%), yeast, dried chicory pulp, sodium chloride, calcium carbonate, linseed oil (0.4%), fructo-oligosaccharides (0.2%), mannan-oligosaccharides (0.2%), apple, pomegranate, pumpkin, green tea, spinach, fennel, borage, chamomile, liquorice, tomato, rosehip, sage, peppermint, glucosamine (0.04%), raspberry, blackberry, mojave yucca, chondroitin sulphate (0.01%) |
| 55 | dehydrated chicken (30%), oats, corn, rice, dried beet pulp, dried chicory pulp (5%), chicken fat, yeast, hydrolyzed chicken protein, flax seeds oil (1.4%), pea fiber (1%), olive oil (0.4%), calcium carbonate, fructo-oligosaccharides (0.2%), sodium chloride, glucosamine, pomegranate dehydrated (0.03%), tomato dehydrated (0.03%), mojave yucca (0.02%)                                                                                                                                                                                                                |
| 56 | cereals (rice 4%), meat and animal derivatives (lamb 5%), oils and fats, derivatives of vegetable origin, minerals                                                                                                                                                                                                                                                                                                                                                                                                                                                             |
| 57 | cereals (rice 4%), meat and animal derivatives, oils and fats, fish and fish derivatives (5%), derivatives of vegetable origin, minerals                                                                                                                                                                                                                                                                                                                                                                                                                                       |
| 58 | pea (65%), dehydrated pork (22%), sunflower oil, hydrolyzed pork protein, flax seeds (1%), calcium                                                                                                                                                                                                                                                                                                                                                                                                                                                                             |

|    |                                                                                                                                                                                                                                                                                                                                                                                                                                                                                                                                                                                |
|----|--------------------------------------------------------------------------------------------------------------------------------------------------------------------------------------------------------------------------------------------------------------------------------------------------------------------------------------------------------------------------------------------------------------------------------------------------------------------------------------------------------------------------------------------------------------------------------|
|    | carbonate, sodium chloride, aloe vera (0.03%), rosemary                                                                                                                                                                                                                                                                                                                                                                                                                                                                                                                        |
| 59 | pea (65%), dehydrated pork (22%), sunflower oil, hydrolyzed pork protein, flax seeds (1%), calcium carbonate, sodium chloride, aloe vera (0.03%), rosemary                                                                                                                                                                                                                                                                                                                                                                                                                     |
| 60 | dehydrated pork (21%), sorghum, pea, wood substances, dried beet pulp, hemp (4%), dried chicory pulp, dehydrated alfalfa, pork fat, oat fibre, salmon oil, hydrolyzed pork protein, yeast, sodium chloride, calcium carbonate, $\beta$ -1,3/1,6 glucans from baker's yeast <i>Saccaromyces cerevisiae</i> (0.1%), glucosamine (0.06%), chondroitin sulphate (0.03%)                                                                                                                                                                                                            |
| 61 | dehydrated duck (33%), corn, rice, chicken fat, dried beet pulp, yeast, flax seeds oil (1.4%), olive oil (0.4%), dried chicory pulp (0.4%), pea fiber (0.4%), calcium carbonate, sodium chloride, pomegranate dehydrated (0.03%), tomato dehydrated (0.03%), mojave yucca (0.02%)                                                                                                                                                                                                                                                                                              |
| 62 | dehydrated lamb (22%), rice, corn, pork fat, dried beet pulp, yeast, flax seeds oil (1.4%), olive oil (0.4%), dried chicory pulp (0.4%), pea fiber (0.4%), calcium carbonate, sodium chloride, pomegranate dehydrated (0.03%), tomato dehydrated (0.03%), mojave yucca (0.02%)                                                                                                                                                                                                                                                                                                 |
| 63 | potato (70%), dehydrated horse (19%), sunflower oil, flax seeds (1%), sodium chloride, aloe vera (0.03%), rosemary                                                                                                                                                                                                                                                                                                                                                                                                                                                             |
| 64 | potato (68%), dehydrated duck (21%), sunflower oil, flax seeds (1%), monosodium phosphate, sodium chloride, aloe vera (0.03%), rosemary                                                                                                                                                                                                                                                                                                                                                                                                                                        |
| 65 | dehydrated pork (20%), sorghum, pea, wood substances, dried beet pulp, hemp (4%), dried chicory pulp, dehydrated alfalfa, pork fat, oat fibre, salmon oil, hydrolyzed pork protein, yeast, sodium chloride, calcium carbonate, $\beta$ -1,3/1,6 glucans from baker's yeast <i>Saccaromyces cerevisiae</i> (0.1%), glucosamine (0.06%), chondroitin sulphate (0.03%)                                                                                                                                                                                                            |
| 66 | dehydrated pork (37%), dehydrated pea, dehydrated banana, chicken fat, dehydrated rabbit (5%), hydrolyzed chicken protein, dehydrated alfalfa, salmon oil, dehydrated herring, dehydrated whole eggs (1%), yeast, dried chicory pulp, sodium chloride, calcium carbonate, linseed oil (0.4%), fructo-oligosaccharides (0.2%), mannan-oligosaccharides (0.2%), apple, pomegranate, pumpkin, green tea, spinach, fennel, borage, chamomile, liquorice, tomato, rosehip, sage, peppermint, glucosamine (0.04%), raspberry, blackberry, mojave yucca, chondroitin sulphate (0.01%) |
| 67 | dehydrated rabbit (23%), corn, rice, chicken fat, dried beet pulp, yeast, flax seeds oil (1.4%), olive oil (0.4%), dried chicory pulp (0.4%), pea fiber (0.4%), calcium carbonate, glucosamine (0.04%), pomegranate dehydrated (0.03%), tomato dehydrated (0.03%), mojave yucca (0.02%)                                                                                                                                                                                                                                                                                        |
| 68 | dehydrated rabbit (24%), corn, rice, chicken fat, dried beet pulp, dehydrated alfalfa, monosodium phosphate, sodium chloride, calcium carbonate, yeast, pomegranate dehydrated (0.03%), tomato dehydrated (0.03%), mojave yucca                                                                                                                                                                                                                                                                                                                                                |
| 69 | dehydrated pork (37%), dehydrated pea, dehydrated banana, chicken fat, dehydrated rabbit (5%), hydrolyzed chicken protein, dehydrated alfalfa, salmon oil, dehydrated herring, dehydrated whole eggs (1%), yeast, dried chicory pulp, sodium chloride, calcium carbonate, linseed oil (0.4%), fructo-oligosaccharides (0.2%), mannan-oligosaccharides (0.2%), apple, pomegranate, pumpkin, green tea, spinach, fennel, borage, chamomile, liquorice, tomato, rosehip, sage, peppermint, glucosamine (0.04%), raspberry, blackberry, mojave yucca, chondroitin sulphate (0.01%) |
| 70 | potato (70%), dehydrated horse (19%), sunflower oil, flax seeds (1%), sodium chloride, aloe vera (0.03%), rosemary                                                                                                                                                                                                                                                                                                                                                                                                                                                             |
| 71 | pea (65%), dehydrated pork (22%), sunflower oil, hydrolyzed pork protein, flax seeds (1%), calcium carbonate, sodium chloride, aloe vera (0.03%), rosemary                                                                                                                                                                                                                                                                                                                                                                                                                     |
| 72 | pea (65%), dehydrated pork (22%), sunflower oil, hydrolyzed pork protein, flax seeds (1%), calcium carbonate, sodium chloride, aloe vera (0.03%), rosemary                                                                                                                                                                                                                                                                                                                                                                                                                     |
| 73 | pea (65%), dehydrated pork (22%), sunflower oil, hydrolyzed pork protein, flax seeds (1%), calcium carbonate, sodium chloride, aloe vera (0.03%), rosemary                                                                                                                                                                                                                                                                                                                                                                                                                     |
| 74 | potato (70%), dehydrated rabbit (20%), sunflower oil, calcium carbonate, monosodium phosphate, flax seeds (1%), sodium chloride, aloe vera (0.03%), rosemary                                                                                                                                                                                                                                                                                                                                                                                                                   |
| 75 | potato (70%), dehydrated rabbit (20%), sunflower oil, monosodium phosphate, calcium carbonate, flax seeds (1%), sodium chloride, aloe vera (0.03%), rosemary                                                                                                                                                                                                                                                                                                                                                                                                                   |
| 76 | dehydrated pork (37%), dehydrated pea, dehydrated banana, chicken fat, dehydrated rabbit (5%), hydrolyzed chicken protein, dehydrated alfalfa, salmon oil, dehydrated herring, dehydrated whole eggs (1%), yeast, dried chicory pulp, sodium chloride, calcium carbonate, linseed oil (0.4%), fructo-oligosaccharides (0.2%), mannan-oligosaccharides (0.2%), apple, pomegranate, pumpkin, green tea, spinach, fennel, borage, chamomile, liquorice, tomato, rosehip, sage, peppermint, glucosamine (0.04%), raspberry, blackberry, mojave yucca, chondroitin sulphate (0.01%) |

|    |                                                                                                                                                                                                                                                                                                                                                                                                                                                                                                                                                                                |
|----|--------------------------------------------------------------------------------------------------------------------------------------------------------------------------------------------------------------------------------------------------------------------------------------------------------------------------------------------------------------------------------------------------------------------------------------------------------------------------------------------------------------------------------------------------------------------------------|
| 77 | potato (68%), dehydrated duck (21%), sunflower oil, flax seeds (1%), monosodium phosphate, sodium chloride, aloe vera (0.03%), rosemary                                                                                                                                                                                                                                                                                                                                                                                                                                        |
| 78 | dehydrated lamb (28%), rice, pea, pork fat, hydrolysed animal proteins with low molecular weight, dehydrated alfalfa, hemp (1%), yeast, dried chicory pulp (0.5%), sodium chloride, camelina oil (0.3%), olive oil (0.3%), $\beta$ -1,3 glucans from baker's yeast <i>Saccharomyces cerevisiae</i> (0.06%), glucosamine (0.04%), dehydrated broccoli (0.03%), pomegranate dehydrated (0.03%), tomato dehydrated (0.03%), mojave yucca, chondroitin sulphate (0.01%)                                                                                                            |
| 79 | dehydrated pork (37%), dehydrated pea, dehydrated banana, chicken fat, dehydrated rabbit (5%), hydrolyzed chicken protein, dehydrated alfalfa, salmon oil, dehydrated herring, dehydrated whole eggs (1%), yeast, dried chicory pulp, sodium chloride, calcium carbonate, linseed oil (0.4%), fructo-oligosaccharides (0.2%), mannan-oligosaccharides (0.2%), apple, pomegranate, pumpkin, green tea, spinach, fennel, borage, chamomile, liquorice, tomato, rosehip, sage, peppermint, glucosamine (0.04%), raspberry, blackberry, mojave yucca, chondroitin sulphate (0.01%) |
| 80 | rice (49%), dehydrated pork (26%), pork fat, dried chicory pulp, dehydrated alfalfa, hydrolyzed pork protein, monocalcic phosphate, brewer's yeast (3%), potassium chloride, pea fiber, flax seeds, sodium chloride, mannan-oligosaccharides (0.3%), fructo-oligosaccharides (0.2%), psyllium husks and seeds, $\beta$ -1,3/1,6 glucans from baker's yeast <i>Saccharomyces cerevisiae</i> (0.07%)                                                                                                                                                                             |
| 81 | potato (70%), dehydrated horse (19%), sunflower oil, flax seeds (1%), sodium chloride, aloe vera (0.03%), rosemary                                                                                                                                                                                                                                                                                                                                                                                                                                                             |

Table S2 - Chemical composition of each sample as declared by the manufacturer in the label of the product (g/100g as is)

| sample | Crude Protein | Crude Fat | Crude Ash | Crude Fiber | Moisture |
|--------|---------------|-----------|-----------|-------------|----------|
| 1      | 34            | 20        | 6.3       | 3.3         | 8        |
| 2      | 32            | 20        | 6         | 3.3         | 8        |
| 3      | 34            | 20        | 6.3       | 3.3         | 8        |
| 4      | 34            | 20        | 6.3       | 3.3         | 8        |
| 5      | 32            | 20        | 6         | 3.3         | 8        |
| 6      | 36            | 17        | 6         | 3.6         | 8        |
| 7      | 37            | 17        | 8         | 3.5         | 8        |
| 8      | 34            | 9.5       | 6.8       | 7           | 8        |
| 9      | 24            | 13        | 6.6       | 2.1         | 8        |
| 10     | 32            | 18.5      | 6         | 3.2         | 8        |
| 11     | 23.5          | 12        | 5         | 2.3         | 8        |
| 12     | 23            | 12        | 6.5       | 2.1         | 8        |
| 13     | 22            | 10        | 6.5       | 3.5         | 8        |
| 14     | 30            | 18        | 6         | 3.5         | 8        |
| 15     | 25            | 16        | 8         | 2.5         | 8        |
| 16     | 25            | 16        | 7         | 2.3         | 8        |
| 17     | 23            | 14        | 7.3       | 2.3         | 8        |
| 18     | 22            | 10        | 7         | 2.5         | 8        |
| 19     | 25.5          | 16        | 7.5       | 2.3         | 8        |
| 20     | 27            | 10.5      | 9         | 6.5         | 8        |
| 21     | 27            | 16        | 6.5       | 2.2         | 8        |
| 22     | 25            | 16        | 7         | 2.3         | 8        |
| 23     | 25            | 16        | 7         | 2.5         | 8        |
| 24     | 27            | 16        | 8         | 2.2         | 8        |
| 25     | 25            | 16        | 7         | 2.5         | 8        |
| 26     | 27            | 16        | 8         | 2.2         | 8        |
| 27     | 25            | 16        | 6.2       | 2.3         | 8        |
| 28     | 25            | 15        | 9         | 2.5         | 8        |
| 29     | 25            | 16        | 8         | 2.2         | 8        |
| 30     | 26            | 16        | 7.2       | 2.3         | 8        |
| 31     | 25            | 16        | 7         | 2.3         | 8        |
| 32     | 23            | 14.5      | 6.5       | 2.5         | 8        |
| 33     | 25            | 15        | 9         | 2.5         | 8        |
| 34     | 25            | 16        | 7         | 2.3         | 8        |
| 35     | 22.5          | 10        | 6.5       | 2.5         | 8        |
| 36     | 25            | 16        | 2.3       | 7           | 8        |
| 37     | 28            | 18        | 7         | 2.3         | 8        |
| 38     | 26            | 11        | 5.8       | 14          | 8        |
| 39     | 30            | 18        | 5.6       | 3.2         | 8        |
| 40     | 26            | 16        | 7.2       | 2.3         | 8        |
| 41     | 27            | 18        | 7         | 2.2         | 8        |
| 42     | 32            | 20        | 8.5       | 2.2         | 8        |
| 43     | 23            | 12        | 6.5       | 2.1         | 8        |
| 44     | 27            | 18        | 7         | 2.2         | 8        |
| 45     | 28            | 18        | 8         | 2.3         | 8        |
| 46     | 23.5          | 10        | 6.5       | 2.5         | 8        |
| 47     | 28            | 18        | 7         | 2.3         | 8        |
| 48     | 32            | 20        | 8.5       | 2.2         | 8        |
| 49     | 22            | 10        | 6.5       | 3.5         | 8        |
| 50     | 23.5          | 11        | 8.5       | 2.3         | 8        |
| 51     | 22            | 10        | 6.5       | 3.5         | 8        |

|    |      |      |     |     |   |
|----|------|------|-----|-----|---|
| 52 | 29   | 16.5 | 6   | 3.3 | 8 |
| 53 | 25   | 16   | 2.3 | 7   | 8 |
| 54 | 36   | 17   | 6   | 3.6 | 8 |
| 55 | 27   | 10.5 | 9   | 6.5 | 8 |
| 56 | 22.5 | 14   | 7.6 | 2.4 | 8 |
| 57 | 22.5 | 14   | 7.2 | 2.3 | 8 |
| 58 | 24.5 | 12   | 5   | 2.3 | 8 |
| 59 | 24.5 | 12   | 5   | 2.3 | 8 |
| 60 | 26.7 | 11   | 5.8 | 14  | 8 |
| 61 | 26.5 | 16   | 8   | 2.2 | 8 |
| 62 | 23   | 14   | 8   | 2.3 | 8 |
| 63 | 22.5 | 11   | 7.8 | 2.3 | 8 |
| 64 | 22.5 | 10   | 6.5 | 2.5 | 8 |
| 65 | 26   | 11   | 5.8 | 14  | 8 |
| 66 | 36   | 17   | 6   | 3.6 | 8 |
| 67 | 23   | 14.5 | 6.5 | 2.5 | 8 |
| 68 | 24.5 | 16   | 7.5 | 3.5 | 8 |
| 69 | 36   | 17   | 6   | 3.6 | 8 |
| 70 | 22.5 | 11   | 7.8 | 2.3 | 8 |
| 71 | 23.5 | 12   | 5   | 2.3 | 8 |
| 72 | 23.5 | 12   | 5   | 2.3 | 8 |
| 73 | 23.5 | 12   | 5   | 2.3 | 8 |
| 74 | 22   | 10   | 6.5 | 3.5 | 8 |
| 75 | 23.5 | 10   | 6.5 | 3.5 | 8 |
| 76 | 36   | 17   | 6   | 3.6 | 8 |
| 77 | 23.5 | 10   | 6.5 | 2.5 | 8 |
| 78 | 25   | 16   | 8   | 2.5 | 8 |
| 79 | 36   | 17   | 6   | 3.6 | 8 |
| 80 | 24   | 13   | 6.6 | 2.1 | 8 |
| 81 | 23.5 | 11   | 8.5 | 2.3 | 8 |
